# Supplementary material for: Structures and magnetic properties of two heterometallic Cu(ii)–Cd(ii) polymers exhibiting antiferromagnetic ordering
Source: Royal Society of Chemistry journal article supplement (doi:10.1039/d2ce00034b), 2022-01-01
Supplement: d2ce00034b1.pdf [file d2ce00034b1.pdf]

**Structures and magnetic properties of two heterometallic Cu(II)-Cd(II) polymers  
exhibiting antiferromagnetic ordering**

Zhong-Yi Li,\* Ran Zhang, Peng-Yu Zhu, Chi Zhang, Dong-Qing Wu and Bin Zhai\*

## **Materials and physical measurements**

All chemicals were purchased from commercial sources and used without further purification. FT-IR spectrums were recorded in the range of 4000-400  $\text{cm}^{-1}$  on a JASCO FT/IR-430 spectrometer with KBr pellet. Elemental analyses were determined by a Vario EL III elemental analyzer. Thermogravimetric analyses were performed under a flow of nitrogen (20 mL/min) at a ramp rate of 10  $^{\circ}\text{C}/\text{min}$ , using a NETZSCH STA 449F3 instrument. Powder X-ray diffraction (PXPD) measurements were carried out on a Bruker D8 ADVANCE X-ray Diffractometer using  $\text{Cu K}\alpha$  ( $\lambda = 1.5418 \text{ \AA}$ ) at room temperature. Magnetic measurements were carried out on a Quantum Design SQUID magnetometer MPMS XL-7. The data were corrected for the sample holder and the diamagnetic contributions.

**Table S1.** Selected bond lengths (Å) and angles (°) for **1**.

|                     |            |                     |           |
|---------------------|------------|---------------------|-----------|
| Cd(1)-O(1)          | 2.324(2)   | Cu(1)-O(4)          | 1.987(2)  |
| Cd(1)-O(3)#2        | 2.389(2)   | Cu(1)-N(1)#4        | 1.995(2)  |
| Cd(1)-O(4)#2        | 2.466(2)   | Cu(1)-O(2)          | 2.008(2)  |
| Cd(1)-O(2)          | 2.563(2)   | Cu(1)-O(7)          | 2.279(2)  |
| Cu(1)-O(5)          | 1.941(2)   |                     |           |
| O(1)-Cd(1)-O(3)#3   | 117.49(7)  | O(4)-Cu(1)-O(2)     | 86.92(8)  |
| O(1)-Cd(1)-O(1)#1   | 119.77(11) | O(4)#3-Cd(1)-O(2)   | 87.91(7)  |
| O(3)#2-Cd(1)-O(3)#3 | 127.86(11) | O(1)-Cd(1)-O(3)#2   | 88.82(7)  |
| O(3)#2-Cd(1)-O(2)   | 141.82(7)  | O(5)-Cu(1)-O(7)     | 89.58(9)  |
| O(1)-Cd(1)-O(4)#2   | 142.51(7)  | O(3)#2-Cd(1)-O(4)#3 | 90.05(7)  |
| Cu(1)-O(2)-Cd(1)    | 151.44(10) | O(4)-Cu(1)-N(1)#4   | 90.08(9)  |
| O(4)#2-Cd(1)-O(2)   | 164.30(7)  | O(2)-Cu(1)-O(7)     | 90.17(9)  |
| O(5)-Cu(1)-O(4)     | 174.25(9)  | O(5)-Cu(1)-O(2)     | 91.28(9)  |
| N(1)#4-Cu(1)-O(2)   | 176.15(9)  | O(5)-Cu(1)-N(1)#4   | 91.48(10) |
| O(1)-Cd(1)-O(2)     | 53.08(7)   | N(1)#4-Cu(1)-O(7)   | 92.53(9)  |
| O(3)#2-Cd(1)-O(4)#2 | 53.69(7)   | O(2)#1-Cd(1)-O(2)   | 92.98(10) |
| O(3)#3-Cd(1)-O(2)   | 79.58(7)   | O(4)#3-Cd(1)-O(4)#2 | 95.45(10) |
| O(1)-Cd(1)-O(4)#3   | 83.20(7)   | O(4)-Cu(1)-O(7)     | 95.88(9)  |
| O(1)#1-Cd(1)-O(2)   | 84.82(7)   | □                   | □         |

Symmetry codes: #1 -x+1, y, -z+1/2; #2 x, -y+2, z-1/2; #3 -x+1, -y+2, -z+1; #4 x, -y+1, z+1/2.

**Table S2.** Selected bond lengths (Å) and angles (°) for **2**.

|                   |            |                   |            |
|-------------------|------------|-------------------|------------|
| Cd(1)-O(1)        | 2.262(3)   | Cu(1)-O(2)        | 1.935(3)   |
| Cd(1)-O(5)        | 2.313(3)   | Cu(1)-O(4)        | 1.952(3)   |
| Cd(1)-O(6)        | 2.317(3)   | Cu(1)-O(7)        | 2.503(1)   |
| O(1)#1-Cd(1)-O(1) | 180        | O(6)-Cd(1)-O(6)#1 | 180.00(15) |
| O(5)-Cd(1)-O(5)#1 | 180        | O(2)-Cu(1)-O(2)#2 | 180.00(6)  |
| O(1)-Cd(1)-O(6)#1 | 103.28(12) | O(4)#2-Cu(1)-O(4) | 180.00(11) |
| O(5)-Cd(1)-O(6)#1 | 91.31(13)  | O(1)-Cd(1)-O(6)   | 76.72(12)  |
| O(2)-Cu(1)-O(4)   | 92.80(13)  | O(2)-Cu(1)-O(4)#2 | 87.20(13)  |
| O(1)-Cd(1)-O(5)#1 | 89.25(13)  | O(5)-Cd(1)-O(6)   | 88.69(13)  |
| O(1)-Cd(1)-O(5)   | 90.75(13)  |                   |            |

Symmetry codes: #1 -x+1, -y, -z+1 #2 -x+1, -y, -z+2.

**Table S3.** Selected hydrogen bond lengths (Å) and bond angles (°) in **1**.

| D-H    | d(D-H) | d(H..A) | ∠DHA   | d(D···A) | A  | Symmetry Code        |
|--------|--------|---------|--------|----------|----|----------------------|
| O7-H7A | 0.857  | 2.012   | 167.6  | 2.855    | O1 | [ -x+1, -y+2, -z+1 ] |
| O7-H7B | 0.869  | 2.179   | 155.73 | 2.993    | O3 | [ -x+1, -y+2, -z+1 ] |

**Table S4.** Selected hydrogen bond lengths (Å) and bond angles (°) in **2**.

| D-H    | d(D-H) | d(H..A) | ∠DHA   | d(D···A) | A  | Symmetry Code        |
|--------|--------|---------|--------|----------|----|----------------------|
| O5-H5B | 0.842  | 1.923   | 159.61 | 2.728    | O9 |                      |
| O5-H5A | 0.842  | 1.889   | 165    | 2.711    | O3 | [ x+1, y, z-1 ]      |
| O6-H6B | 0.844  | 1.987   | 162.9  | 2.804    | O8 |                      |
| O6-H6A | 0.84   | 2.325   | 124.33 | 2.884    | O2 | [ -x+1, -y, -z+1 ]   |
| O6-H6A | 0.84   | 2.595   | 143.58 | 3.309    | O4 | [ x, y, z-1 ]        |
| O6-H6A | 0.84   | 2.429   | 136.97 | 3.097    | O7 | [ x, y, z-1 ]        |
| O7-H7B | 0.848  | 2.061   | 165.31 | 2.889    | O8 | [ -x+1, -y+1, -z+1 ] |
| O7-H7A | 0.842  | 2.045   | 167.57 | 2.872    | O3 | [ x+1, y, z ]        |
| O9-H9B | 0.849  | 2.047   | 166.22 | 2.879    | O4 | [ -x+1, -y, -z+2 ]   |
| O9-H9A | 0.839  | 2.246   | 144.18 | 2.967    | O1 | [ x+1, y, z ]        |
| O9-H9A | 0.839  | 2.517   | 142.78 | 3.225    | O6 | [ x+1, y, z ]        |
| O8-H8B | 0.848  | 2.141   | 145.22 | 2.878    | O5 |                      |
| O8-H8A | 0.848  | 2.069   | 150.86 | 2.84     | O9 | [ -x+1, -y+1, -z+1 ] |

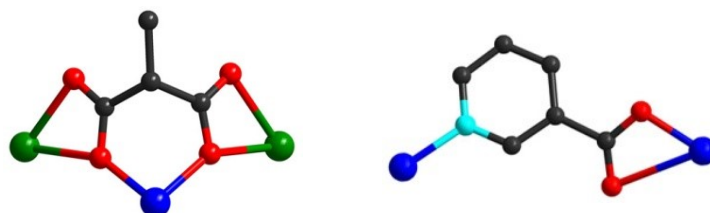**Fig. S1** Coordinate modes of  $\text{MMA}^{2-}$  and  $\text{NTA}^-$  ligands in **1**.

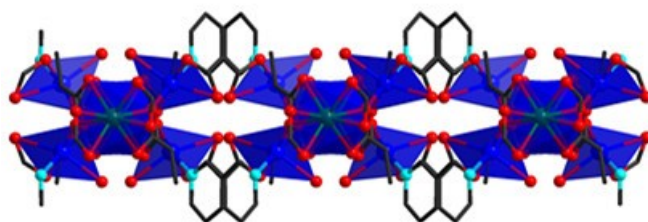

**Fig. S2** The 2D structure of **1** viewed along *c* axis.

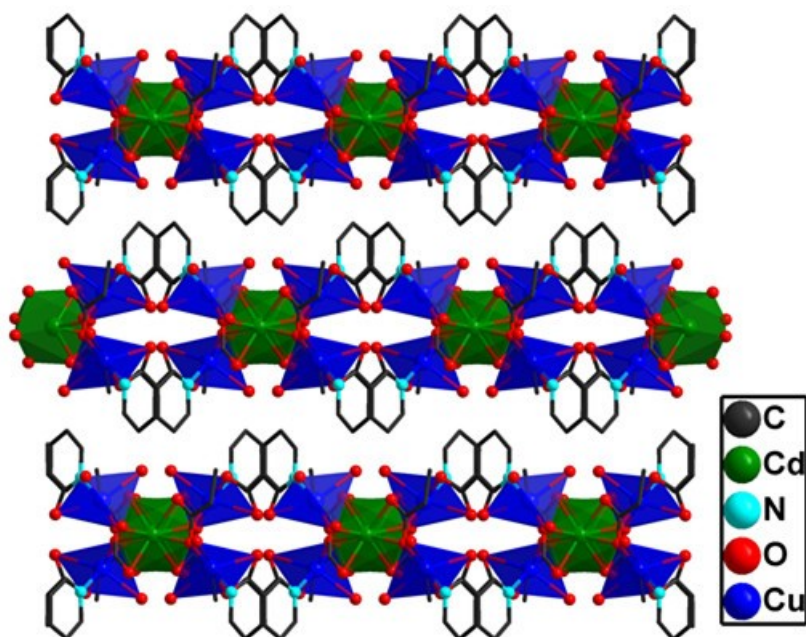

**Fig. S3** The packing diagram of the 2D structure of **1** viewed along *c* axis.

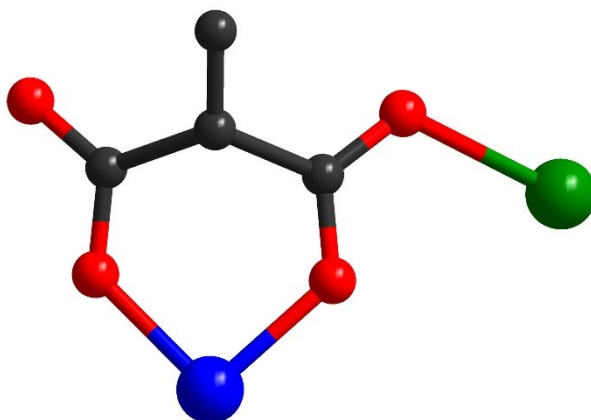

**Fig. S4** Coordinate mode of MMA<sup>2-</sup> ligand in **2**.

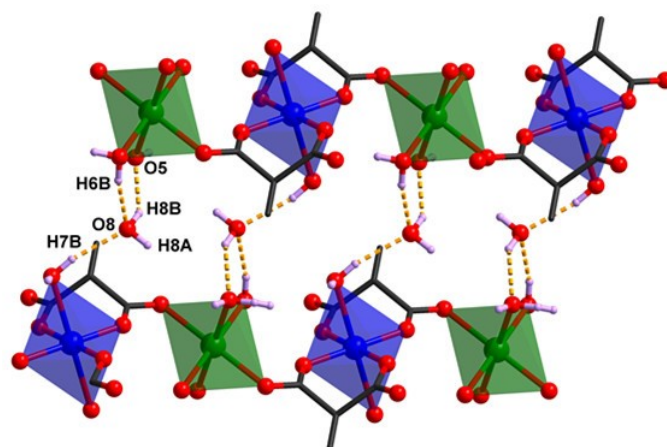

**Fig. S5** The 2D hydrogen-bond network of **2** between the adjacent 1D chains in the *bc* plane.

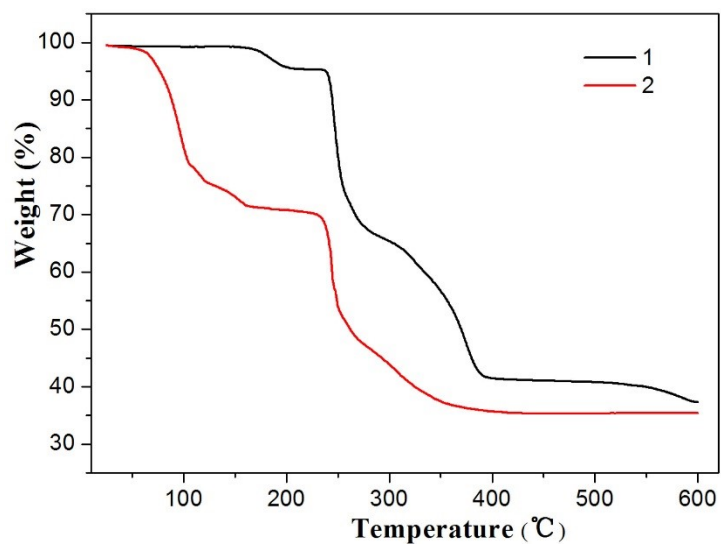

**Fig. S6** TGA curves for **1** and **2** in a nitrogen atmosphere (10 °C/min).

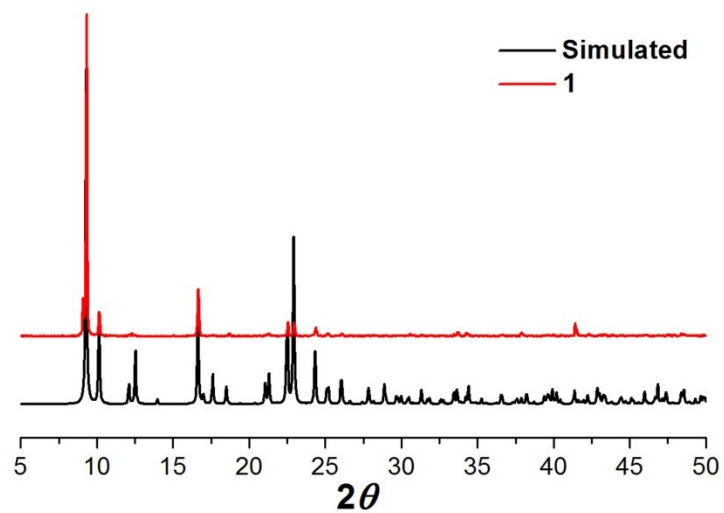

**Fig, S7** Powder X-ray diffraction pattern of **1**.

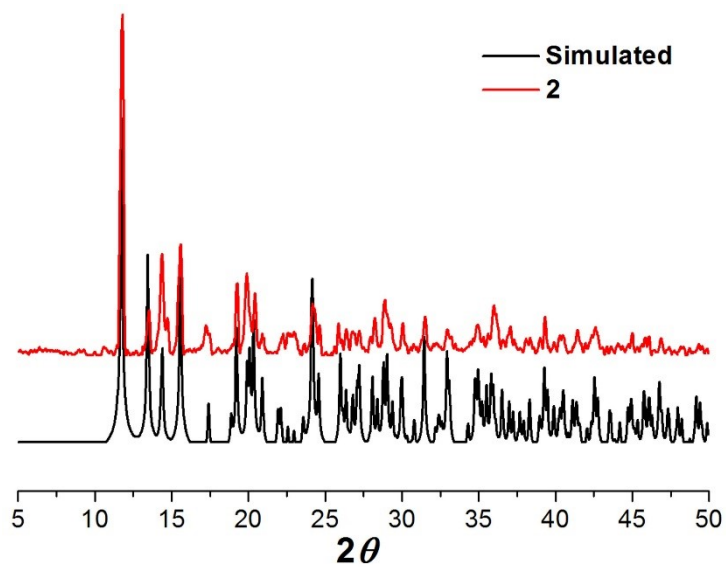

**Fig, S8** Powder X-ray diffraction pattern of **2**.

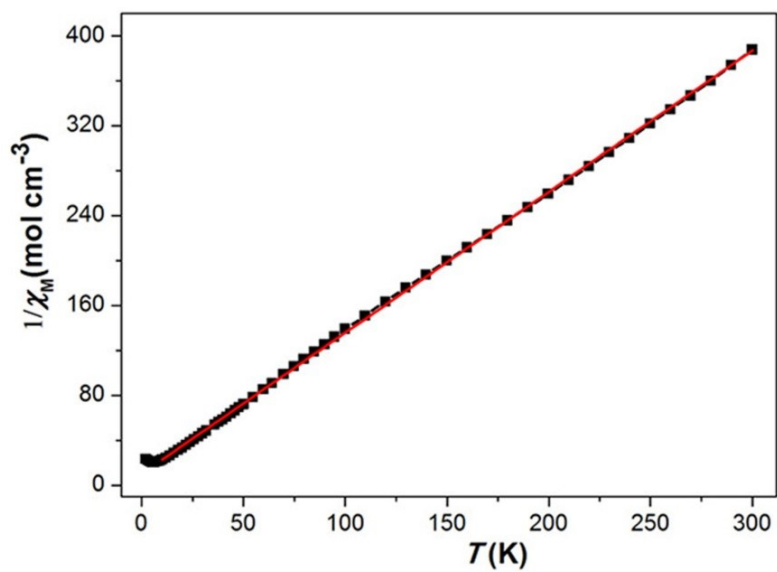

**Fig. S9** Temperature dependence of the  $1/\chi_M$  values for **1** at 1000 Oe dc magnetic field. The red solid line represents the best fit to the data between 10 and 300 K.

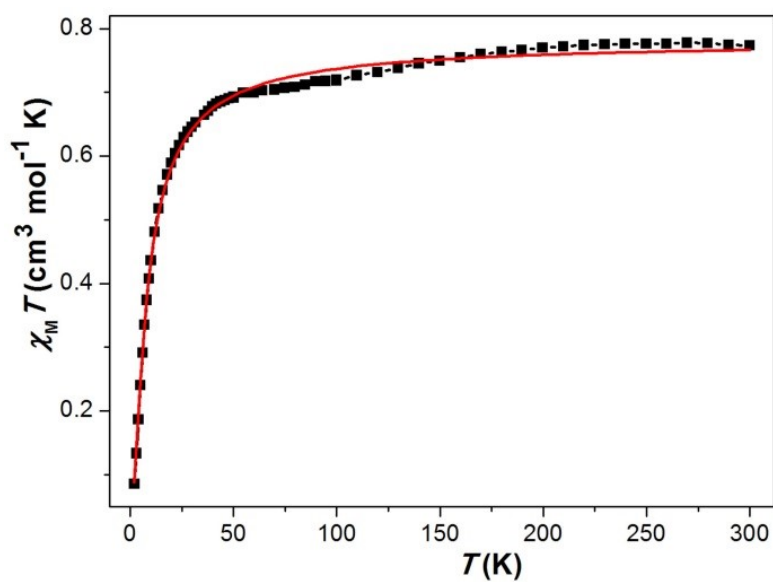

**Fig. S10** The best fit to the data of the temperature dependence of the  $\chi_M T$  values for **1** based on the dinuclear  $[\text{Cu}_2]$ -based 1D model with the inter-chain interactions.



**The fitting equations based on the mononuclear Cu<sup>2+</sup> model:**

$$\chi = \frac{Ng^2\beta^2}{3kT} \quad (1)$$

$$\chi_M = \frac{\chi}{1 - (2zJ' / Ng^2\beta^2)\chi} \quad (2)$$

**The fitting equations based on the discrete dinuclear [Cu<sub>2</sub>] cluster model with the Hamiltonian  $\underline{H} = -2J\Sigma S_1 S_2$ :**

$$\chi_d = \frac{2Ng^2\beta^2}{kT} \times \frac{1}{3 + e^{-2J/kT}} \quad (3)$$

$$\chi_M = \frac{\chi_d}{1 - (2zJ' / Ng^2\beta^2)\chi_d} \quad (4)$$

**Table S5.** The parameters of the best fitting based on different models.

| Parameters                                           | Mononuclear model     | Dinuclear [Cu <sub>2</sub> ] cluster model |                       | [Cu <sub>2</sub> ]-based 1D model |                       |
|------------------------------------------------------|-----------------------|--------------------------------------------|-----------------------|-----------------------------------|-----------------------|
| <i>g</i>                                             | 2.93(1)               | 2.00(1)                                    | 2.05(1)               | 2.04(1)                           | 2.04(1)               |
| <i>zJ'</i> / cm <sup>-1</sup>                        | -12.03(1)             | -                                          | -3.21(1)              | -                                 | 0.12(1)               |
| <i>J</i> ( <i>J<sub>d</sub></i> ) / cm <sup>-1</sup> | -                     | -4.42(1)                                   | -2.91(1)              | -1.36(1)                          | -1.39(1)              |
| <i>J<sub>d</sub></i> / cm <sup>-1</sup>              | -                     | -                                          | -                     | -1.75(1)                          | -1.77(1)              |
| <i>R</i>                                             | 1.15×10 <sup>-3</sup> | 1.74×10 <sup>-3</sup>                      | 3.20×10 <sup>-4</sup> | 1.95×10 <sup>-4</sup>             | 1.95×10 <sup>-4</sup> |

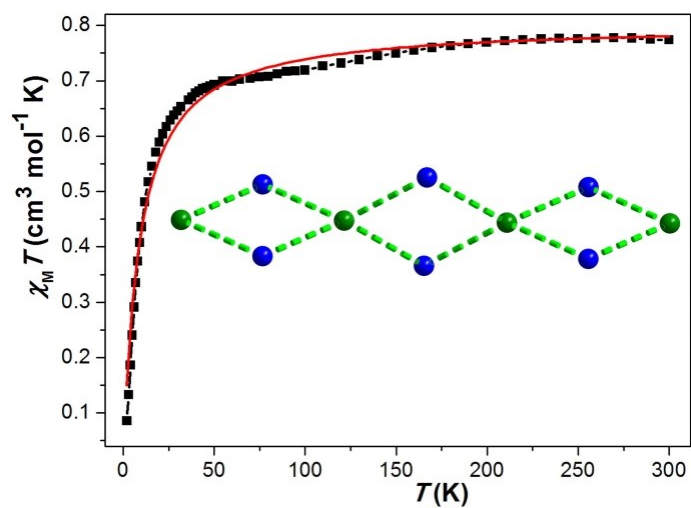

**Fig. S11** The best fit to the data of the temperature dependence of the  $\chi_M T$  values for **1** based on the discrete mononuclear  $\text{Cu}^{2+}$  model (inset) with the interactions between the neighboring  $\text{Cu}^{2+}$  ions.

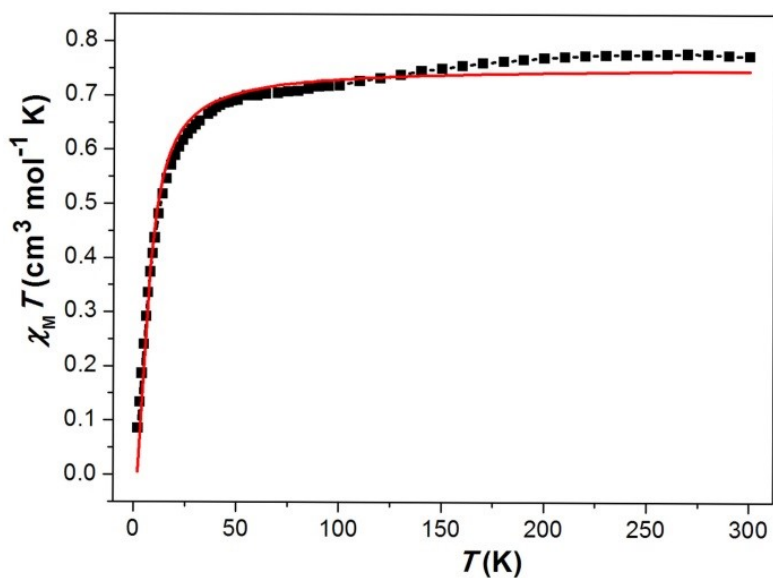

**Fig. S12** The best fit to the data of the temperature dependence of the  $\chi_M T$  values for **1** based on the discrete dinuclear  $[\text{Cu}_2]$  cluster model without the inter-cluster interactions.

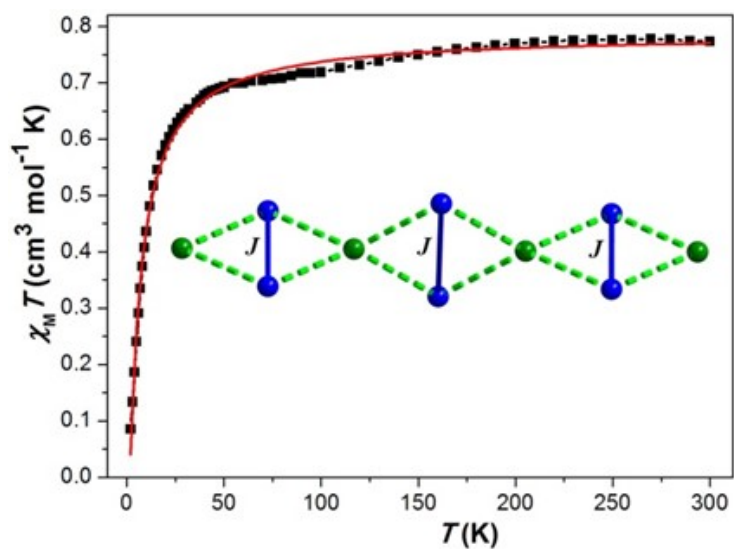

**Fig. S13** The best fit to the data of the temperature dependence of the  $\chi_M T$  values for **1** based on the discrete dinuclear  $[\text{Cu}_2]$  cluster model with the inter-cluster interactions.

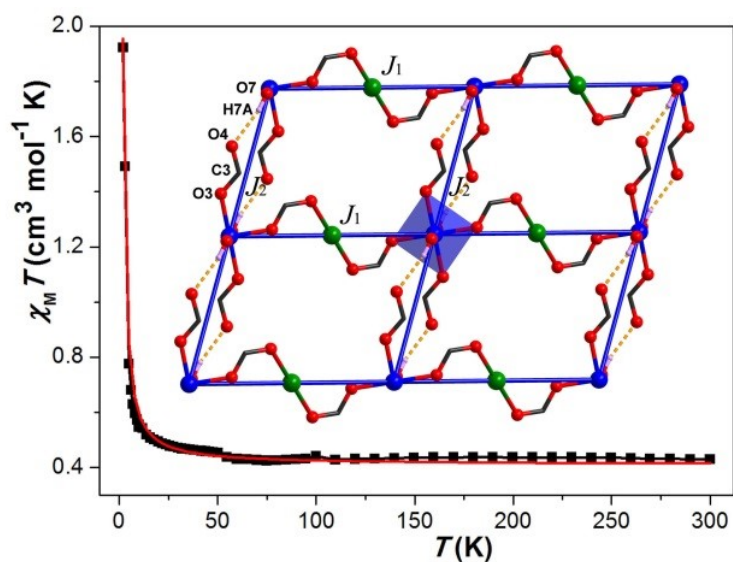

**Fig. S14** Temperature dependence of the  $\chi_M T$  data for **2** at 1000 Oe dc magnetic field. The red solid line represents the best fit to the data based on the 2D grid model with different coupling parameters. Inset: Schematic diagram of the magnetic exchange pathways of the 2D grid model.

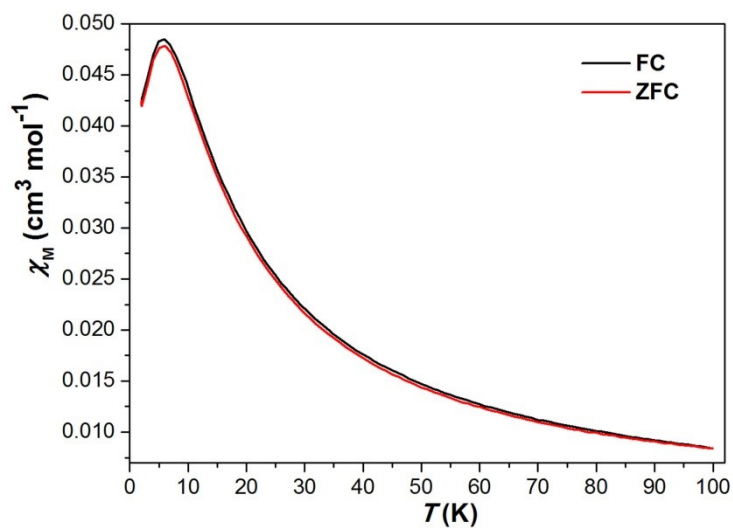

**Fig. S15** FC and ZFC magnetization curves of **1** at 100 Oe.

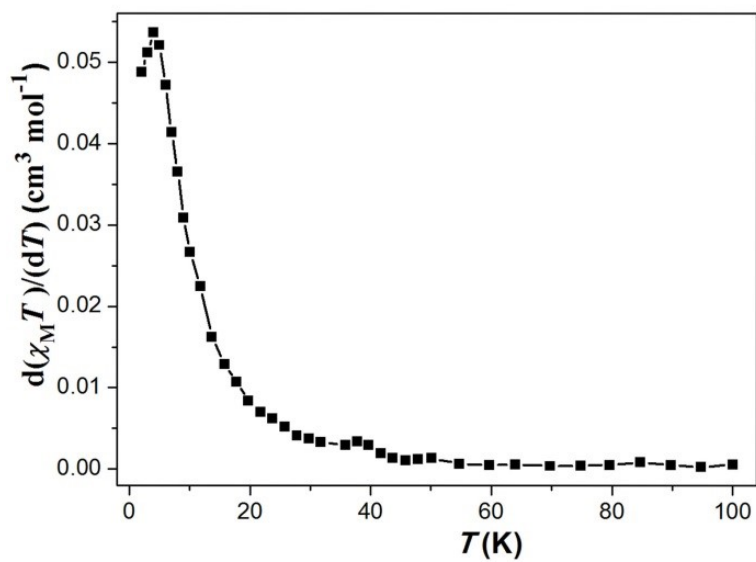

**Fig. S16** Plot of the temperature dependence of  $d(\chi_M T)/dT$  of **1** measured at a 1000 Oe field.

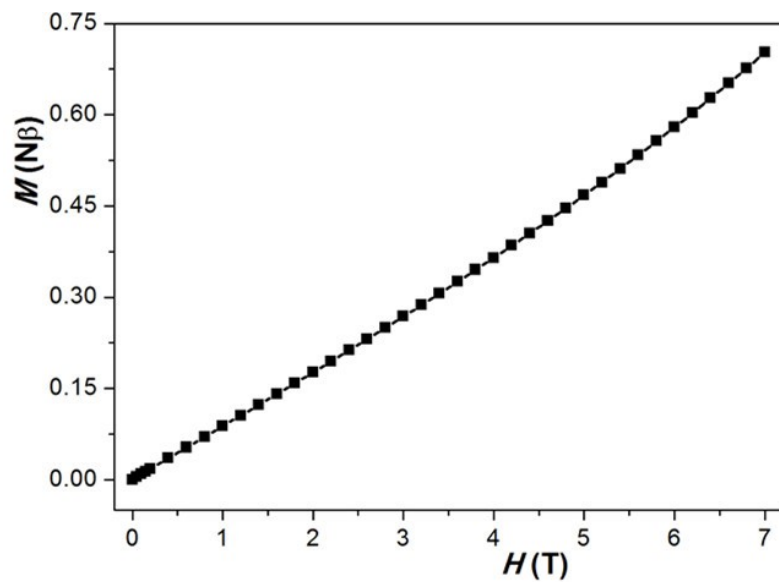

**Fig. S17** Magnetization *versus* applied magnetic field at 2.0 K for **1**.

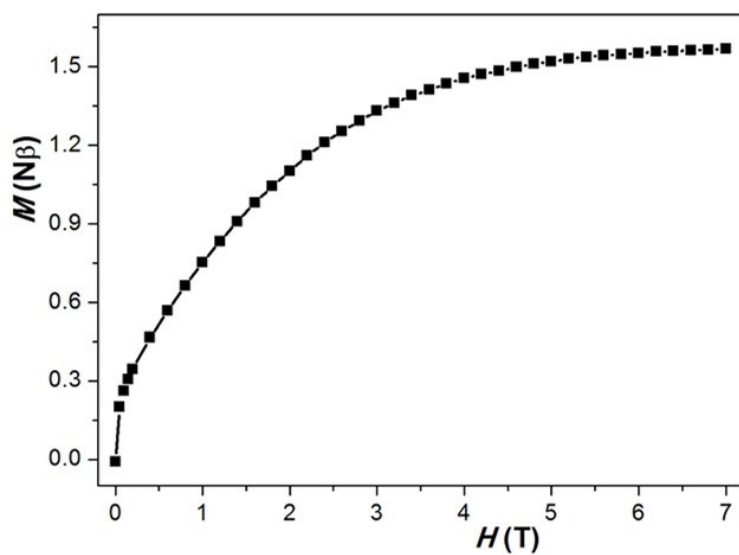

**Fig. S18** Magnetization *versus* applied magnetic field at 2.0 K for **2**.

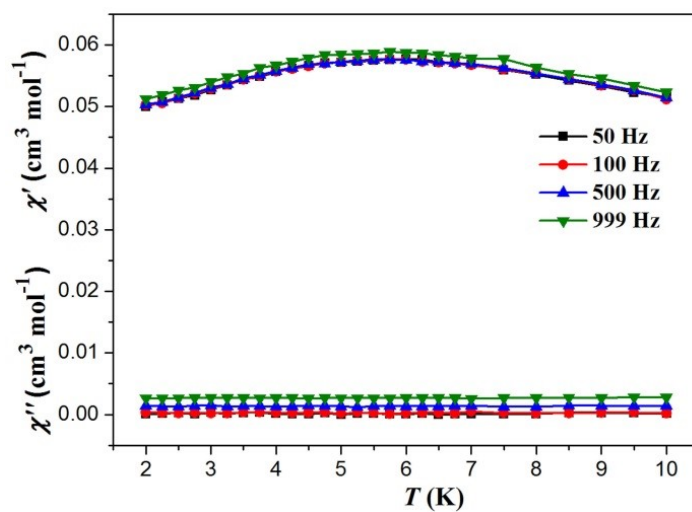

**Fig. S19** Temperature dependence of the in-phase ( $\chi'$ ) and out-of-phase ( $\chi''$ ) ac susceptibilities for **1** between 2 and 10 K at the indicated frequencies and in zero dc field.

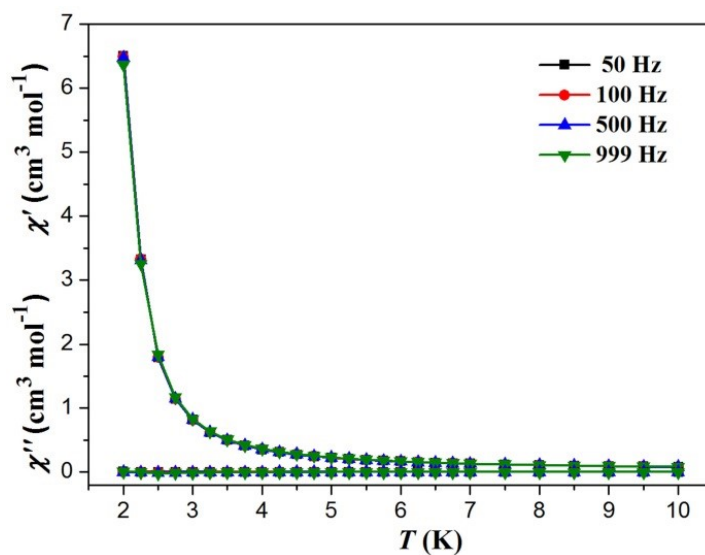

**Fig. S20** Temperature dependence of the in-phase ( $\chi'$ ) and out-of-phase ( $\chi''$ ) ac susceptibility for **2** at the indicated frequencies and in zero dc field.
